# How long does it take to eliminate an epidemic without herd immunity?

Bhavin S. Khatri\*

Department of Life Sciences, Imperial College London,  
Silwood Park, Ascot, SL5 7PY, United Kingdom  
The Francis Crick Institute, 1 Midland Road, London, NW1 1AT, United Kingdom

\*To whom correspondence should be addressed; E-mail: [bkhatri@imperial.ac.uk](mailto:bkhatri@imperial.ac.uk)

The global response to the SARS-Cov-2 pandemic has consisted of two main strategies both involving non-pharmaceutical interventions to control spread: mitigation, ultimately relying on herd immunity from vaccination, and elimination of infections locally. While simple theory for controlling an epidemic through herd immunity exist, there is no corresponding simple theory for the strategy of elimination with non-pharmaceutical interventions. Here we quantify an important aspect of the elimination strategy: the time to extinction without herd immunity, based solely on non-pharmaceutical interventions. Using a simple well-mixed stochastic SIR model, we find two new results: 1) using random walk theory we calculate a simple approximation of the mean extinction time and 2) using branching process theory the full distribution of times to extinction, which we show is given by the extreme value Gumbel distribution. We compare these results against complex spatially-resolved stochastic simulations to show very good quantitative agreement, demonstrating the validity of this simple approach. Overall, for SARS-Cov-2 our results predict rapid extinction — of order months — of an epidemic or pandemic if the reproductive number is kept to  $R_e < 0.5$ ; in a counterfactual scenario with global adoption of an elimination strategy in June 2020, SARS-Cov-2 could have been eliminated world-wide by early January 2021.

## 23 Introduction

24 The SIR model has remained a popular paradigm to understand the dynamics of epidemics (1,  
25 2), despite its simplifications compared to real world epidemics, which have spatial structure (3,  
26 4), heterogeneity (5, 6) in connection between regions and heterogeneity in contact rates between  
27 individuals, often giving rise to super-spreading events (7). The SIR model makes a simple prediction  
28 for a closed population (2): in the absence of any interventions and assuming individuals recovered  
29 from infection have permanent immunity, infections increase, eventually leading to the population  
30 developing herd immunity, at which point infections decline and after some time the epidemic goes  
31 extinct.

32 However, for infectious diseases, such as SARS-Cov-2 , we have seen such strategies, which carry  
33 a high burden of hospitalisation and mortality may not be socially and politically acceptable. This  
34 led to much of the globe adopting mitigation strategies, particularly in the West, which broadly,  
35 allowed infections to increase within the allowed capacity of health infrastructure, adopting non-  
36 pharmaceutical interventions (NPIs) when necessary, while a number of countries in the Asia-Pacific  
37 region adopted an elimination strategy that aimed to eliminate infections through NPIs (8, 9). Al-  
38 though, the latter strategy does not explicitly aim at eradication — since in the absence of concerted  
39 global cooperation, it is clear in a global pandemic an infectious disease cannot be eradicated, until  
40 it has been essentially eradicated everywhere — it does aim at a local eradication or elimination,  
41 such that infections are not routinely circulating in the population. Although, there has been some  
42 specific modelling regarding elimination, for example, in New Zealand (9), there is in general a basic  
43 lack of fundamental and simple theoretical results for this second scenario, which this paper addresses  
44 through calculation of the timescales of eradication/extinction both at a national and global level.

45 In practice, the mitigation strategy is a stop-gap measure until population immunity can be  
46 achieved by vaccination and if the population is vaccinated to a sufficient fraction to achieve herd  
47 immunity, then the epidemic will decline. A key assumption that negates in practice the ultimate  
48 prediction of extinction of epidemics, is the lack of long-term immunity, particularly amongst the  
49 family of coronaviridae, which SARS-Cov-2 is a member, as well as the evolution of new escape  
50 variants. Currently, for SARS-Cov-2 the question of long-term immunity is not completely known,  
51 whether by natural immunity or vaccine induced; although there is evidence of waning antibody  
52 immunity on the timescale of a few months (10), the overall immunological response maybe more  
53 robust over the timescale of roughly a year (11, 12). Importantly, although vaccines may have high  
54 efficacy for reducing serious disease, the picture regarding a significant reduction in transmission is  
55 still not clear (13–16). In addition, as the recent emergence of new variants (17, 18) have shown,  
56 there is the possibility that vaccine escape mutants could evolve (19), reducing the efficacy or  
57 rendering redundant vaccines based on previously circulating antigen sequences. Although, much is  
58 still unknown, in a worst case scenario where immunity is short-lived and infections are endemic (20),  
59 there will be a continuing risk of vaccine escape, and so alternative strategies may be required;  
60 ultimately, even for those countries pursuing mitigation, elimination may be the only option available,  
61 other than naturally acquired immunity.

62 This paper examines the SIR model, but fully accounting for the discreteness of individuals that  
63 leads to stochasticity in the progress of an epidemic. This is critical to examine the question of  
64 extinction, since the continuous (deterministic) SIR model is unrealistic when only a few individuals  
65 are infected and gives the erroneous prediction that extinction only arises asymptotically at very long

66 times. There has been considerable work done on understanding stochastic aspects of epidemics  
67 (21, 22) from the role of critical community sizes in diseases such as measles (23, 24), stochastic  
68 phases in the establishment of epidemics (25), to stochastic extinction. With regard stochastic  
69 extinction most results have been focussed on understanding the time to extinction either through the  
70 whole course of an epidemic (26, 27) or assuming a quasi-equilibrium has been reached through herd  
71 immunity in the population (28). However, the situation faced by many countries at the beginning  
72 stages of the SARS-Cov-2 pandemic and before vaccination, has not been strongly considered in  
73 previous modelling, that is where significant herd-immunity has not been achieved in the population,  
74 and there is the potential that NPIs alone can be used to reduce the reproductive number to less  
75 than 1, the critical threshold for growth and give rise to extinction of an epidemic.

76 It is with this scenario in mind, where a population still has many more susceptible (& recovered),  
77 compared to infected, where our main simple result is focussed, and we find the stochastic dynamics  
78 tractable within a simple birth-death branching process framework. Our main theoretical result is the  
79 distribution of the times to extinction of an epidemic, which surprisingly, we find is a Gumbel-type  
80 extreme value distribution. Although the extinction time distribution has been previously studied (29),  
81 a closed form solution for a Poisson offspring distribution was not obtained. Key to this result is  
82 a new threshold  $I^\dagger = 1/(1 - R_e)$ , below which stochastic changes dominate and which we show  
83 arises from simple random walk theory. However, we then also extend the calculation using heuristic  
84 considerations that cover the whole range of  $0 < R_e \leq 1$ , accounting for the dynamics of  $R_e$ , when  
85  $R_e \lesssim 1$ , where by necessity population immunity must play a role in the dynamics of the epidemic.  
86 As this result ignores spatial structure and heterogeneity of an epidemic, we then compare to simple  
87 and more complex spatial epidemic simulations, and find our theory captures the extinction time  
88 distribution very well, as long as  $R_e$  is appropriately rescaled to account for migration. We then use  
89 this theory to make broad predictions of extinction times within the UK, and globally to serve as a  
90 guide to more complex and detailed models. Our key message is that for an infectious disease like  
91 SARS-Cov-2, where infection durations are of order a week, reproductive numbers  $R_e > 0.6$  give  
92 extinctions times which are long and of order many years — on the other hand, extinction can be  
93 rapid with times much less than a year, or a few months, if restricted to  $R_e < 0.5$ .

## 94 Susceptible–Infected–Recovered (SIR) model of epidemiology

95 The SIR model divides the population of  $N$  individuals in a region into 3 classes of individuals:  
96 susceptible  $S$  (not infected and not immune to virus),  $I$  infected and  $R$  recovered (and immune,  
97 so cannot be re-infected). If we assume a rate  $\beta$  of an infected individual infecting a susceptible  
98 individual ( $S + I \rightarrow 2I$ ), and a rate  $\gamma$  that an infected person recovers from illness ( $S \rightarrow R$ ), the  
99 ordinary differential equations describing the dynamics of this process are:

$$100 \quad \frac{dS}{dt} = -\beta I(S/N) \quad (1)$$

$$101 \quad \frac{dI}{dt} = \beta I(S/N) - \gamma I \quad (2)$$

$$102 \quad \frac{dR}{dt} = \gamma I. \quad (3)$$

103 A key aspect of this model is that it allows a simple characterisation of when number of infections  
104 will grow or decline: whatever the previous history of the epidemic, for growth we need  $\frac{dI}{dt} > 0$  and  
105 this happens for the following condition on RHS of the 2nd equation above:  $\beta S(t)/N - \gamma > 0$ ,  
106 or equivalently,  $R_e = \frac{\beta S(t)/N}{\gamma} > 1$ , where we have defined the dimensionless number  $R_e$  (also  
107 commonly called  $R_t$ ) as the combination shown, and will in general be time-dependent, as the  
108 number of susceptible individuals in a population change.  $R_e$  represents the average number of  
109 individuals an infected person infects through the duration of the infection  $\tau = 1/\gamma$ . It is important  
110 to understand that this interpretation of  $R_e$  is within the context of a well-mixed model. In reality,  
111 locally there may be deviations from the global density of susceptible individuals ( $S(t)/N$ ) and also  
112 differences in connectivity between different regions causing differing rates of infection locally.

113 It is worthwhile to briefly revisit how extinction arises through herd immunity in the standard SIR  
114 model, in contrast to the main mechanism we discuss in this paper, where there is extinction without  
115 herd-immunity and only using NPIs. Initially, it is assumed the whole population is susceptible, as  
116 the number of infected is 1 or very small, so  $S(t=0) \approx N$  and the reproductive number in this case  
117 is  $R_0 = \beta/\gamma$ . The above SIR equations lead to a growing number of infected  $I(t)$ , and a decreasing  
118 susceptible pool  $S(t)$ , which leads to a decreasing  $R_e$ . The epidemic continues to grow until  $R_e = 1$   
119 (i.e. when the fraction of susceptibles has become sufficiently small), at which point  $dI/dt = 0$  — this  
120 defines the classic herd-immunity threshold of the number of immune/recovered  $1 - 1/R_e$ . The classic  
121 herd immunity threshold only defines the point when the effective reproductive number is exactly 1,  
122 and in fact the number of susceptibles continues to decline beyond this point, causing  $R_e < 1$ , until  
123 it reaches a plateau  $S^\infty$  (2). The plateau corresponds to when infections have become sufficiently  
124 small that additional infections cause only a negligible change to the susceptible pool; once this  
125 plateau is reached we have a constant “ultimate” reproductive number  $R_e^\infty = -W(-R_e e^{-R_0}) < 1$ ,  
126 where  $W(z)$  is Lambert’s  $W$ -function, which is defined by the solution to the transcendental equation  
127  $we^w = z$ . In this limit, as discussed below, the number of infected then declines exponentially until  
128 extinction.

## 129 **Assumption of constant $R_e$ with small fraction of infected individuals** 130 **in SIR model**

131 As just discussed, in an idealised SIR epidemic, if  $\beta$  does not change due to behavioural changes,  
132 the reproductive number is in general a constantly decreasing number, due to the susceptible pool  
133 of individuals diminishing — this eventually leads to herd immunity as the decreasing susceptible  
134 fraction brings  $R_e < 1$ . However, changes in social behaviour (non-pharmaceutical interventions or  
135 NPIs) can also bring  $R_e < 1$  by controlling  $\beta$ , before any significant herd immunity is established,  
136 which was generally still the case in many countries with SARS-Cov-2 (before February 2021), when  
137 vaccination coverage was low. In this case, if we assume that the fraction of the population that are  
138 currently infected is small, compared to the number of susceptibles, we can assume that the effects  
139 of herd immunity are negligible; analogously to the description with herd immunity, this is manifested  
140 by an approximately unchanging susceptible pool and constant effective reproductive number  $R_e$ .

141 Using the United Kingdom as an example, just after the first lockdown, the UK Office for National  
142 Statistics (30) estimates from serological testing in England that 6.8% of the population had been  
143 infected to June 12th 2020 ( $\approx 4.6 \times 10^6$  extrapolated to the UK population) and from random PCR

144 testing a current incidence of 0.055% ( $\approx 3.7 \times 10^4$  were actively infected in UK) – in which case,  
145 extrapolating to a UK population size of  $\approx 67 \times 10^6$ , the total number of susceptibles ( $\approx 62 \times 10^6$ )  
146 is much greater than the number currently infected. More recently, with the emergence of more  
147 transmissible variants and varied application of NPIs, infections peaked at of order a million, and  
148 roughly 18.5% of the population estimated to have antibodies in February 2021 (31); this leads to a  
149 susceptible pool of approximately 55 million, which is still much greater than the number currently  
150 infected.

151 In this case, as long as  $R_e$  isn't very close to 1, it is reasonable to assume that the population of  
152 susceptible individuals  $S(t) = S_0$  is roughly constant and the reproductive number unchanging  $R_e =$   
153  $\frac{\beta S(t)/N}{\gamma} \approx \frac{\beta S_0/N}{\gamma}$ ; although each time an individual is infected, we lose exactly one susceptible the  
154 relative change of the susceptible pool is negligible, since the total number of susceptible individuals  
155 is very large. As we show in Supplementary Materials, this approximation is good as long as  $R_e < R_e^*$ ,  
156 where  $R_e^* = -W(-e^{-R_0(1-R(0)/N)})$ , which corresponds to an initial value of  $R_e$ , such that the decline  
157 is sufficiently rapid that the error due to ignoring the change in the susceptible pool is negligible.  
158 Calculating  $R_e^*$  within the United Kingdom, last summer infections were small  $I_0 \approx 3 \times 10^4$  and  
159 assuming roughly 10% had recovered ( $R(0) = 0.1N$ ), we find the constant  $R_e$  assumption to be  
160 good for  $R_e < 0.98$ , i.e. for all but  $R_e$  very close to 1, however, using numbers from January 2021,  
161  $I_0 \approx 10^6$ , and 15% recovered this requires  $R_e < 0.82$ . Assuming that  $I_0 \ll S_0$  and  $R_e < R_e^*$ , this  
162 model of constant  $R_e$  should also be very reasonable, when there is no immunity (SIS model), or in  
163 the presence of waning immunity, where immunity only lasts a finite time (SIRS), since increasing the  
164 susceptible pool again should have negligible effect, since we assume the total number of susceptibles  
165 is very large in comparison.

166 This means for the case where only a small fraction of the population are ever currently infected,  
167 the SIR dynamics results in a single differential equation for  $I(t)$ :

$$\frac{dI}{dt} = (\beta S_0/N - \gamma)I. \quad (4)$$

168 The last differential equation involving  $R$  can be ignored as it is really only there for book-keeping,  
169 as there is no direct effect of  $R$  on the dynamics of  $S$  and  $I$ . The solution to this is of course an  
170 exponential function:

$$I(t) = I_0 e^{(\beta S_0/N - \gamma)t} = I_0 e^{\rho_e t},$$

171 where  $\rho_e = \gamma(R_e - 1)$  is the effective growth rate for  $R_e > 1$ , and decay rate when  $R_e < 1$ , and  
172  $I_0 = I(0)$  the initial number of infected individuals. Note that  $R_e$  is not a rate, it does not in  
173 absolute terms tell you anything about the time scales of change; however,  $\rho_e$  is a rate, and if it  
174 could be measured empirically, it would give information in the speed of spread of the infection, as  
175 well as having the same sign information for the direction of change ( $\rho_e > 0$  the epidemic spreads,  
176 while  $\rho_e < 0$  means the epidemic cannot spread). As we will see  $\rho_e$  more directly determines the  
177 dynamics of the extinction process than  $R_e$  or  $\gamma$  separately, and is in fact an easier quantity to  
178 determine (Supplementary Materials).

179 We are interested in understanding extinction of an epidemic and so from here on we define the  
180 rate  $\rho_e = \gamma(1 - R_e)$  to be a positive quantity, making the assumption that  $R_e < 1$ . In this case we  
181 can make a simple deterministic prediction for the time to extinction, by calculating the time for the  
182 infected population to reach  $I(t) = 1$ :

$$t^\dagger = \frac{1}{\rho_e} \ln(I_0), \quad (5)$$

183 Of course, we want to know the time to complete elimination  $I(t) = 0$ , but we cannot answer this  
184 question with a deterministic continuous approximation, since the answer would be  $\infty$ ; the time it  
185 takes to go from 1 infected individual to 0 cannot be handled in a deterministic approach, since  
186 it ignores the discreteness of individuals and the stochasticity that lies therein. In fact, without  
187 understanding the stochasticity of the extinction process, it is difficult a priori to say anything about  
188 the goodness of this deterministic calculation, since in general we would expect stochasticity to be  
189 important far before there remains only a single infected individual. We answer below, using heuristic  
190 arguments, the minimum number of infected individuals needed to overcome stochastic effects and  
191 confirm that this threshold also arises as a key determinant in the extinction time distribution in an  
192 exact branching process calculation.

## 193 Stochastic extinction of an epidemic

194 The above analysis assumes deterministic dynamics with no discreteness – it ignores any randomness  
195 in the events that lead to changes in number of infected individuals; an infected person might typically  
196 take the tube to work, potentially infecting many people, whilst on another day decide to walk or  
197 take the car, reducing the chances of infecting others. When the epidemic is in full flow with large  
198 numbers of individuals infected, all the randomness of individual actions, effectively average out to  
199 give smooth almost deterministic behaviour. However, at the beginning of the epidemic, or towards  
200 the end, there are very small numbers of individuals infected, so these random events can have a  
201 large relative effect in how the virus spreads and need a stochastic treatment to analyse. We are  
202 interested in analysing the stochasticity of how the number of infected decreases when  $R_e < 1$  and  
203 eventually gives rise to extinction, i.e. when there is exactly  $I = 0$  individuals; in particular, we are  
204 primarily interested in calculating the distribution of the times to extinction.

205 We can initially confirm that the assumptions of a constant  $R_e$  due to a negligibly changing  
206 susceptible population of the previous section are accurate, by running multiple replicate stochastic  
207 continuous time simulations with Poisson distributed events (Gillespie or kinetic Monte Carlo sim-  
208 ulations) (32) of the SIR model with  $R_e = 0.7$ ,  $\gamma = 1/7 \text{ days}^{-1}$ ,  $I_0 = 3.7 \times 10^4$  and an initial  
209 recovered population of  $R(0) = 6 \times 10^6$ , which for simplicity we take as 10% of population infected  
210 and recovered. Fig.1 plots the decline in number of infected over time  $I(t)$ . Each of the trajectories  
211 from the Gillespie simulations is a grey curve, whilst the deterministic prediction (Eqn.5) is shown  
212 as the solid black line. We see that for  $I(t) \gg 1$  the stochastic trajectories are bisected by the  
213 deterministic prediction, indicating that the assumption of a constant  $R_e$  is a good one.

## 214 Simple random walk analysis

215 We can see from Fig.1 that as  $I(t)$  approaches extinction, as expected the trajectories become more  
216 and more varied as the number of infected becomes small. A simple heuristic treatment inspired  
217 from population genetics (35) would define a stochastic threshold  $I^\dagger$ , below which stochastic forces  
218 are more important than deterministic, as indicated by the dashed black line in Fig.1; the time to



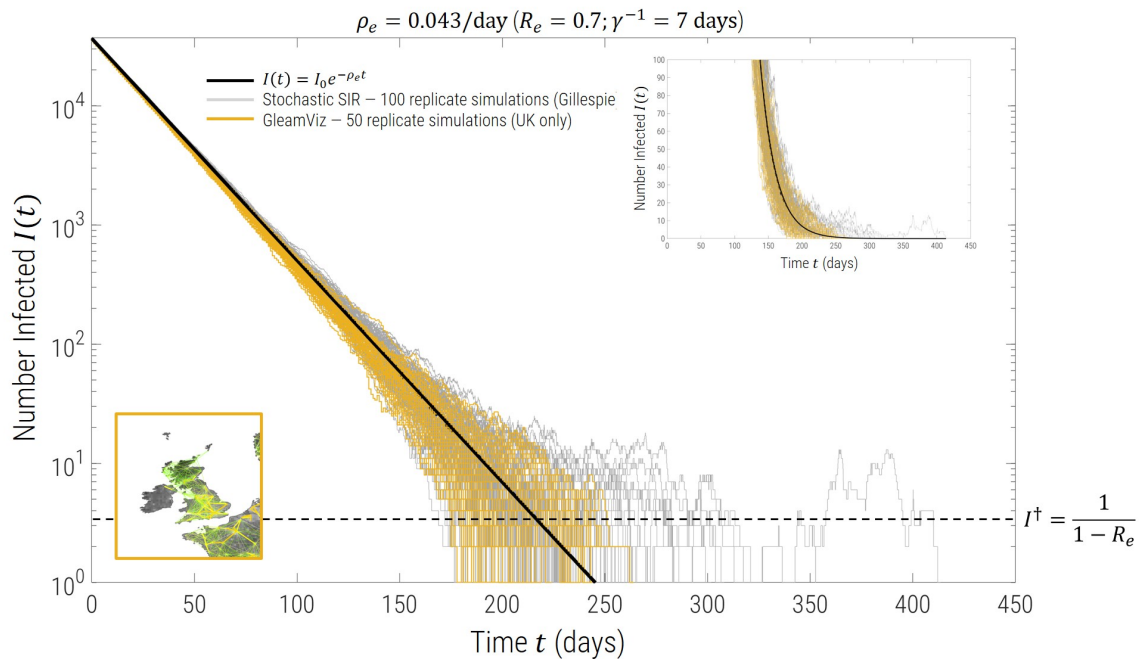

Figure 1: Simulation trajectories on log-linear scale (inset: linear-linear scale) for a decay rate of  $\rho_e = 0.043/\text{day}$ , corresponding to  $R_e = 0.7$ ,  $1/\gamma = 7$  days,  $I_0 = 3.7 \times 10^4$  and an initial recovered population of  $R(0) = 6 \times 10^6$ . The solid black line is the deterministic prediction from Eqn.5, grey trajectories are 100 replicate Gillespie simulations of a standard SIR model, whilst the yellow trajectories are from 50 replicates using the spatial epidemic simulator GleanViz (33, 34) restricted to the United Kingdom with a gravity model between heterogeneous sub-populations as shown in the inset map of the UK. The dashed black line is the threshold number of infected individuals  $I^\dagger$ , below which changes in infected number of individuals is mostly stochastic.

219 extinction is then approximately the sum of the time it takes to go deterministically from  $I_0$  to  $I^\dagger$   
 220 ( $\frac{1}{\rho_e} \ln(I_0/I^\dagger)$ ) and the time it takes to go from  $I^\dagger$  to  $I = 0$  by random chance.

221 Assuming such a threshold  $I^\dagger$  exists, this latter stochastic time can be approximated as follows: if  
 222 there are  $n \leq I^\dagger$  infected individuals and changes are mainly random, then we are randomly drawing  
 223 individuals from a pool of  $n$  infected individuals and  $N - n$  non-infected individuals — a binomial  
 224 random walk — which when  $n \ll N$  has standard deviation  $\approx \sqrt{n}$  per random draw, which means  
 225 we need  $k = n$  random draws, such that the standard deviation over those  $k$  draws is  $\sqrt{kn} \approx n$ ; a  
 226 single random draw corresponds to one infection cycle of the virus, which is  $\tau = 1/\gamma$  days, so the  
 227 time to extinction starting with  $n$  individuals is approximately  $n/\gamma$ .

228 How do we estimate  $I^\dagger$ ? It is given by the threshold size at which random stochastic changes,  
 229 change the number of infected by the same amount as the deterministic decline. In one cycle  
 230 or generation of infection, if there was no stochasticity, the number of infected would decline by  
 231  $\approx \rho_e I^\dagger / \gamma$ , so equating this to the expected standard deviation of purely random changes,  $\sqrt{I^\dagger}$ , we

232 find  $I^\dagger = 1/(1 - R_e)$ , which is shown in Fig.1 for  $R_e = 0.7$ . Note that this threshold is closely  
 233 related to Williams' threshold theorem (36), where the probability of establishment of an epidemic  
 234 from a single infected individual is  $p^* = 1 - 1/R_e$ , in the case that  $R_e > 1$ , which then gives a  
 235 critical number of infected  $I^* \sim 1/p^* = R_e/(R_e - 1)$ , below which infections changes as a random  
 236 walk.

237 As discussed below, and in more detail in the Supplementary Materials, a more exact calculation  
 238 of these considerations, using branching process theory, gives exactly the same expression for  $I^\dagger$ .  
 239 This means the typical stochastic phase lasts  $I^\dagger/\gamma = \frac{1}{\rho_e}$  days and so adding the deterministic and  
 240 stochastic phases, the mean time to extinction  $\approx \frac{1}{\rho_e}(1 + \ln(I_0/I^\dagger))$  (see Eqn.8 below for a more  
 241 exact expression of the mean).

## 242 Exact branching process analysis

243 The branching process framework used to calculate the distribution of extinction times is standard,  
 244 but detailed, and so we will sketch the derivation here and leave details for the Supplementary  
 245 Materials. The first step is to recognise that there are two independent stochastic events that give  
 246 rise to the net change in the numbers of infected individuals, as depicted in Eqn. 4 for the continuum  
 247 deterministic limit: 1) a susceptible individual is infected by an interaction with a infected individual,  
 248 such that  $I \rightarrow I + 1$  and 2) an infected individual recovers spontaneously such that  $I \rightarrow I - 1$ . This  
 249 is a simple birth death branching process for which it possible to write down differential equations  
 250 ( $dp_I(t)/dt$ ) for how the probability of  $I$  infected individuals changes with time in terms of the birth  
 251 and death events just defined. It is possible to find after some calculation the probability generating  
 252 function  $G(z, t)$  of the birth-death process, from which the probability of having exactly  $I = 0$   
 253 individuals as a function of time is given by:

$$p_0(t) = G(z = 0, t) = \left( \frac{1 - e^{-\rho_e t}}{1 - R_e e^{-\rho_e t}} \right)^{I_0}. \quad (6)$$

254 If  $p^\dagger(t)$  is the distribution of times to extinction (i.e. the probability of an extinction occurring between  
 255 time  $t$  and  $t + dt$  is  $p^\dagger(t)dt$ ), then clearly the integral of this distribution, between time 0 and  $t$  is  
 256 exactly Eqn.6, and hence the distribution of times to extinction is simply the derivative of  $p_0(t)$  with  
 257 respect to time. Doing this and also taking the limit that  $I_0 \gg I^\dagger$ , we find:

$$p^\dagger(t) = \frac{dp_0(t)}{dt} \approx \rho_e e^{-\rho_e(t-\tau^\dagger)} \exp(-e^{-\rho_e(t-\tau^\dagger)}) \quad (7)$$

258 where  $\tau^\dagger = \frac{1}{\rho_e} \ln(I_0/I^\dagger)$ , which is the time it takes for number infected to change from the initial  
 259 number  $I_0$  to the critical infection size, which this calculation shows is given by  $I^\dagger = \frac{1}{1-R_0}$ ; pleasingly,  
 260 this is the same result as arrived by the simple heuristic analysis above. Fig.2 shows a histogram  
 261 (grey bars) from Gillespie simulations of the SIR model with 5000 replicates of the number of infected  
 262 individuals for  $R_e = 0.7$ ,  $\gamma = 1/7$  days, with initial number infected  $I_0 = 3.7 \times 10^4$  and an initial  
 263 recovered population of  $R(0) = 6 \times 10^6$ , corresponding to the situation in the UK in 12<sup>th</sup> June  
 264 2020. The corresponding prediction from Eqn.7 is given by the solid black line — we see that  
 265 there is an excellent correspondence. In addition, Fig.5, we see that for the range of  $R_e < R_e^*$  the  
 266 mean extinction time from simulation fits this prediction perfectly. Surprisingly, the extinction time



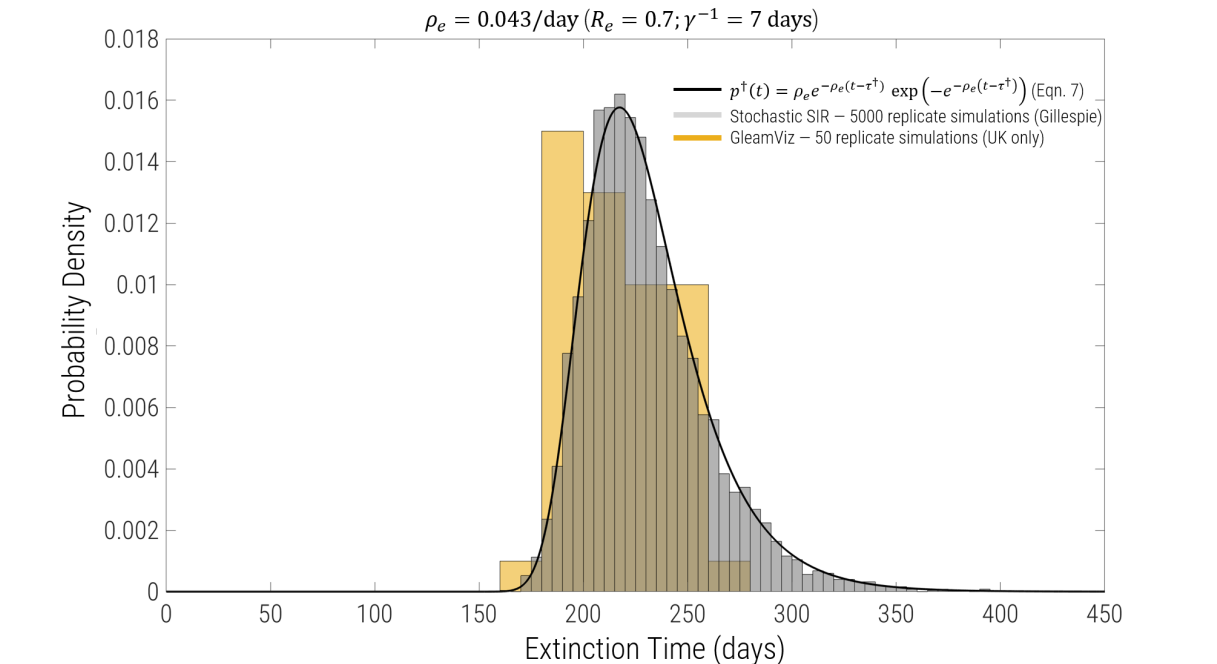

Figure 2: Probability density of extinction times for the same parameters as in Fig.1. Grey bars are a histogram of 5000 replicate simulations of Gillespie simulations normalised to give an estimate of the probability density, and the black curve is the prediction of the analytical calculation given in Eqn.7, which we see matches the simulations extremely well. The yellow bars are histograms from the GlemViz spatial epidemic simulator with 50 replicates, which we see gives similar results to the predictions of the stochastic SIR model.

267 distribution is a Gumbel-type extreme value distribution (37, 38); it is surprising as an extreme value  
 268 distribution normally arises from the distribution of the maximum (or minimum) of some quantity,  
 269 although here it is not clear how this relates to the extinction time.

270 There are number of standard results for the Gumbel distribution Eqn.7, so we can write down  
 271 (or directly calculate) the mean and standard deviation of the extinction time:

$$272 \quad \langle t \rangle = \frac{1}{\rho_e} \left( \Upsilon + \ln \left( \frac{I_0}{I^\dagger} \right) \right) \quad (8)$$

$$273 \quad \sqrt{\langle t^2 \rangle} = \frac{\pi/\sqrt{6}}{\rho_e}, \quad (9)$$

274 where  $\Upsilon \approx 0.577$  is the Euler-Mascheroni constant (conventionally assigned the symbol  $\gamma$ , but here  
 275  $\gamma$  is the recovery rate). We see that the heuristic calculation overpredicts the stochastic part of the  
 276 extinction time by a factor of  $\approx 2$ . Note that the standard deviation or dispersion of the distribution  
 277 only depends on the inverse of the rate of decline  $\rho_e$  and as expected not on the initial number of

278 infected individuals  $I_0$ ; hence as  $\rho_e$  decreases ( $R_e$  gets closer to 1), we see that the distribution of  
279 extinction times broadens (as we see below in Fig.6).

280 We can also calculate the cumulative distribution function

$$P^\dagger(t) = \int_0^t p^\dagger(t') dt' = \exp(-e^{-\rho_e(t-\tau^\dagger)}), \quad (10)$$

281 from which the inverse cumulative distribution function  $T^\dagger = (P^\dagger)^{-1}$  can be calculated:

$$T^\dagger(p) = \tau^\dagger - \frac{1}{\rho_e} \ln(-\ln(p)), \quad (11)$$

282 which enables direct generation of random numbers drawn from the extinction time distribution, by  
283 drawing uniform random  $u$  on the unit interval and calculating  $T^\dagger(u)$ . It also allows calculation of  
284 arbitrary confidence intervals, for example, the 95% confidence intervals, by calculating  $T^\dagger(0.025)$   
285 and  $T^\dagger(0.975)$ , as well as the median  $T^\dagger(1/2) = \tau^\dagger - \frac{1}{\rho_e} \ln(\ln(2))$ .

286 Finally, it is important to stress that the distribution of extinction times Eqn.7 and the following  
287 results all assume that  $I_0 \gg I^\dagger$ , so that there is a clear separation of the deterministic and stochastic  
288 phases of the decline in infections. A more general and exact result for the distribution of extinction  
289 times is given in the Supplementary Materials.

## 290 Extinction time distribution with spatial structure and heterogeneity

### 291 National level (United Kingdom)

292 A potentially valid criticism is that real populations have spatial structure and heterogeneity of  
293 contacts between regions. To make comparison to our simple predictions, we used a complex epidemic  
294 simulator GleanViz (v7.0) (33, 34), which includes a gravity model of migration, where rates of  
295 migrations between sub-populations are proportional to their population sizes (see Fig.1 inset map  
296 of UK), and each sub-population based on accurate census data within a grid of 25 km. We ran  
297 50 replicate simulations for an SIR epidemic within the United Kingdom and with zero air travel  
298 to other countries, with the same parameters as the stochastic SIR simulations in the previous  
299 section (corresponding to 12<sup>th</sup> June 2020:  $R_e = 0.7$ ,  $\gamma = 1/7$  days, initial recovered population  
300  $R(0) = 6 \times 10^6$  – in addition, each definable sub-population in the UK was given a current infection  
301 incidence of 0.06% giving a total  $I_0 \approx 3.7 \times 10^4$ ). We see the trajectories (Fig.1 – yellow lines) and  
302 histogram of extinction times (Fig.2 – yellow bars) compare very favourably to the predictions of the  
303 stochastic SIR model (black solid line and grey histogram bars); the mean and standard deviation  
304 including the gravity migration model is  $211 \pm 16$  days, which is slightly smaller than the prediction of  
305 the stochastic SIR model which has no migration or spatial structure ( $231 \pm 30$  days). This suggests  
306 that heterogeneity and migration might together have the net effect of reducing extinction times, as  
307 below we see increasing migration uniformly, has the opposite effect; nonetheless within the UK it  
308 would seem the overall effect of heterogeneity and migration is of second order to predictions of a  
309 well mixed model. Overall, at a national level, we find the results of our simple model are accurate  
310 to within the width of the distributions of the extinction times.

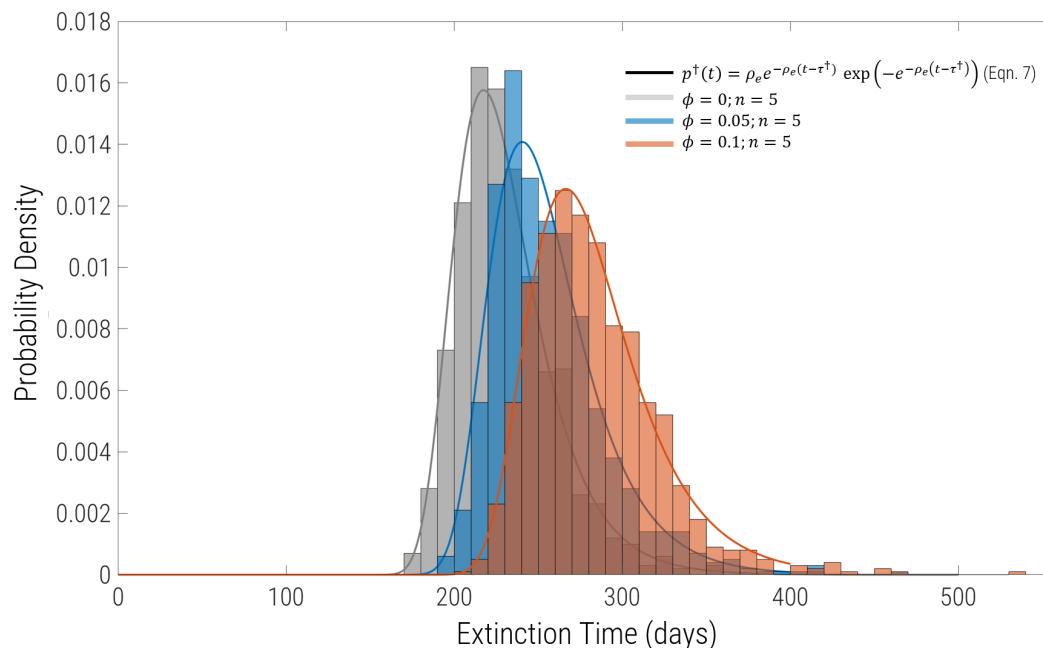

Figure 3: Probability density of extinction times for the same parameters as in Fig.1, but including migration and sub-division into equal sized populations. Each histogram comprises 1000 replicates for  $n = 5$  regions connected by uniform migration with probability  $\phi$ . Grey bars are  $\phi = 0$  (complete isolation), blue correspond to  $\phi = 0.05$  and  $\phi = 0.1$  are the red bars. For  $\phi = 0$  the solid line grey line is exactly the solid black line in Fig.2, showing that the extinction time distribution of identical to the single global well-mixed population of same aggregate size. The solid blue and red lines are fits to the histogram using Eqn.7 with a single free parameter  $R_e$  (with  $\gamma$  and  $I_0$  constrained to the values used to run the simulations).

### 311 Global

312 It was not possible to repeat these simulations on a global scale as GleanViz does not record individual  
 313 level changes in infections and deaths in its global output. Here instead we first consider the total  
 314 extinction time distribution for a number of isolated regions (countries) with no migration between,  
 315 but each with the same  $R_e$ . As we show in the Supplementary Materials, in fact, the extinction  
 316 time distribution of the whole region (i.e. the distribution of the maximum time of all the groups) is  
 317 exactly the same distribution as assuming a single unstructured/undivided population for the region.  
 318 We verify this by Gillespie simulation of a simple birth-death model with growth rate  $\gamma R_e$  and death  
 319 rate  $\gamma$  for  $n$  isolated populations; the grey histogram in Fig.3 is the estimate of the extinction time  
 320 distribution for isolated sub-populations and this matches the grey solid line, which is exactly the  
 321 solid black line in Fig.2.

322 We now look at the effect of migration, where we examine the same Gillespie simulations of birth

323 and death, but with a probability of global migration per individual of  $\phi$ . As we increase  $\phi$  we see that  
 324 the extinction time distribution shifts to longer times, yet still maintains the same form as given by  
 325 Eqn.7 – fitting to this equation using only  $R_e$  as a free parameter, we find for  $\phi = \{0.01, 0.05, 0.1\}$ ,  
 326  $\hat{R}_e = \{0.709 \pm 0.001, 0.732 \pm 0.001, 0.760 \pm 0.001\}$ , respectively (minimum  $R$ -sqd statistic of 0.975).  
 327 These fits are shown as the blue and red solid lines in Fig.3 for  $\phi = 0.05$  and  $\phi = 0.1$ , respectively,  
 328 and we see that the fits follow the data very closely (the histogram and fits for  $\phi = 0.01$  are not shown  
 329 in Fig.3 for clarity, as they overlap closely with  $\phi = 0$ ). We see that we can predict these estimated  
 330 reproductive numbers  $\hat{R}_e$  by simply rescaling the base  $R_e$  to  $R_e \rightarrow (1 + \phi)R_e = \{0.707, 0.735, 0.77\}$   
 331 for  $\phi = \{0.01, 0.05, 0.1\}$ , respectively. This finding is closely related to the literature on the group  
 332 level reproductive number  $R_*$  (3–5), except here we are studying the decline and extinction of an  
 333 epidemic/pandemic as opposed to its establishment, which has not been previously studied in this  
 334 context. Overall, these results suggest that under the assumption that each national region has the  
 335 same  $R_e$ , that the extinction time distribution is given by the stochastic SIR model (Eqn.7) but with  
 336 a rescaled  $R_e$  to account for air traffic or migration between regions/countries.

### 337 Modification to theory for $R_e > R_e^*$

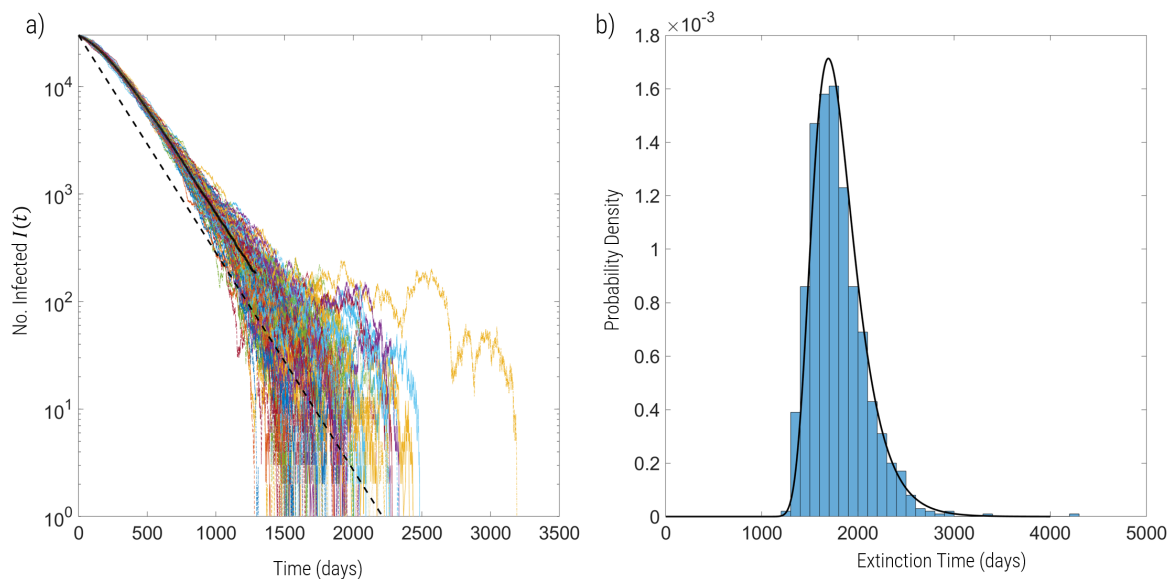

Figure 4: a) Trajectories of numbers infected  $I(t)$  for simulations with  $R_e = 0.99 > R_e^*$  for  $I_0 = 3 \times 10^4$ ,  $N = 67 \times 10^6$  and assuming 10% of population recovered at time  $t = 0$ , which gives  $R_e^* \approx 0.97$ ; the solid line is the mean of the simulations, while the dashed line shows the decline of infections if  $R_e = R_e^\infty$  from  $t = 0$ , where we see the slope is the same as the mean at longer times. b) Histogram of extinction time distributions of the same simulations with prediction given by Eqn7, but with  $R_e \rightarrow R_e^\infty$  and  $\tau^\dagger \rightarrow \tau^\dagger + 1/\rho_e^\infty$ , as detailed in the text.

338 When  $R_e$  is close to 1, we can no longer assume that changes in the number of susceptibles  
339 has a negligible effect on  $R_e$  itself. In this case the decline of infections is initially non-exponential,  
340 since  $R_e$  decreases over time, as we see in the trajectories of Fig.4a, but at later times becomes  
341 exponential again, once  $R_e$  is sufficiently small that again changes in  $S$  become relatively negligible.  
342 As we detail in the Supplementary Materials, there is a critical value of  $R_e$  above which the constant  
343  $R_e$  assumption is no longer an accurate approximation, which is given by

$$R_e^* = -W(-e^{-R_0(1-R(0)/N)}). \quad (12)$$

344 For  $R_e > R_e^*$ , we take a semi-heuristic approach and calculate the steady state value of number of  
345 susceptible  $S^\infty$ , by integrating the SIR equations and then calculate

$$R_e^\infty = R_0 S^\infty / N = -W(-R_e e^{-R_0(1-R(0))}), \quad (13)$$

346 as the steady-state value of the reproductive number once infections have become sufficiently small.  
347 In Fig.4a, we plot how infection would decline with  $R_e = R_e^\infty$ , which we see has the same slope on  
348 a log-linear plot as the asymptotic mean of the simulation trajectories at later times (solid line).

349 To calculate the extinction time distribution for  $R_e > R_e^*$ , we substitute for  $R_e^\infty$  for  $R_e$  in Eqn.7  
350 and in addition, make the substitution  $\tau^\dagger \rightarrow \tau^\dagger + 1/\rho_e^\infty$ , where  $\rho_e^\infty = \gamma(1 - R_e^\infty)$  to account for  
351 the time it takes to reach this steady state. We see in Fig.4b, that this prediction for the extinction  
352 time distribution matches the histogram of times obtained by simulation very well. In addition, we  
353 see in Fig.5 that the mean extinction time of simulations fits the predictions very well for  $R_e > R_e^*$ .  
354 Finally, we can simply “stitch” the solutions for  $R_e \leq R_e^*$  and  $R_e > R_e^*$ , if needed, using a standard  
355 tanh switching function for  $\tau^\dagger$ , as detailed in the Supplementary Materials, and shown as the dashed  
356 line in Fig.5.

357 It is interesting to note that for  $R_e > R_e^*$ , the extinction times are significantly lower for a higher  
358 number of initial infected because  $R_e^\infty$  is much lower; in essence the higher infection levels lead to a  
359 significant *relative* reduction in the susceptible pool causing  $R_e$  to drop more dramatically.

## 360 Extinction time predictions for SARS-Cov-2

### 361 United Kingdom

362 We first consider what this model predicts for the extinction of the SARS-Cov-2 epidemic within the  
363 United Kingdom, given an estimate of number infected of  $I_0 \approx 3.7 \times 10^4$  with approximately 10%  
364 of the population immune for June 2020, when the epidemic was near it's lowest incidence, and for  
365 the current number of infected  $I_0 = 7 \times 10^5$ , assuming roughly 70% of the population are immune  
366 through a combination of infection and vaccination (39). In Fig.6a we have plotted the estimates  
367 of mean (solid line) together with 95% confidence intervals (shaded region), given an initial number  
368 of infected  $I_0$  for various reproductive numbers  $R_e$  between  $0 < R_e < 1$ . In all these estimates we  
369 assume a typical duration of  $1/\gamma = 7$  days for infections (40).

370 We see three broad trends: 1) for  $R_e > \approx 0.6$  the extinction times are very long of order years,  
371 whilst at the same time the 95% confidence intervals becomes increasingly broad (of order years  
372 themselves) meaning increasing unpredictability; 2) also for  $R_e > \approx 0.6$ , the deterministic prediction  
373 increasingly and significantly overestimates the mean extinction time; 3) for  $R_e < 0.5$  the extinction

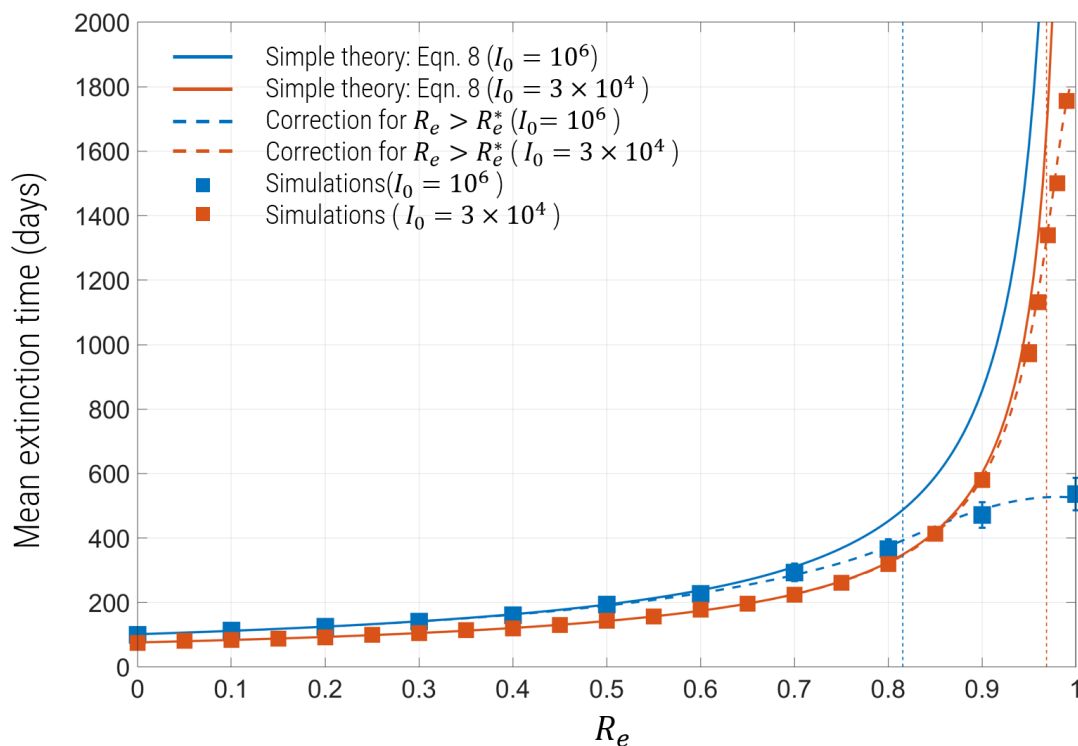

Figure 5: Mean extinction times for  $I_0 = 3 \times 10^4$  (red) and  $I_0 = 10^6$  (blue) for  $N = 67 \times 10^6$  and assuming 10% of population has recovered. The simple theory (Eqn.8) that assumes a constant unchanging  $R_e$  are shown by solid lines, while the theory modified for values of  $R_e > R_e^*$  are shown as dashed lines. The values of  $R_e^*$  are indicated by the vertical dashed lines, which for  $I_0 = 3 \times 10^4$  is  $R_e^* \approx 0.97$  and for  $I_0 = 10^6$  is  $R_e^* \approx 0.83$ . The filled squares are the mean extinction times obtained using simulations for same sets of parameters.

374 times plateau with diminishing returns for further decreases in the reproductive number. Regarding  
 375 point 3), we see that there is minimum time to extinction, given by  $R_e = 0$ ; from Eqn.8 in the  
 376 limit that  $R_e \rightarrow 0$ , the mean time to extinction  $\langle t \rangle \rightarrow 1/\gamma(\ln(I_0) + \Upsilon)$ , which shows the extinction  
 377 process is ultimately limited by the rate of recovery  $\gamma$ , imposing a maximum speed limit on the rate  
 378 of decline of infections.

379 In the case corresponding to summer 2020, we see that the simple stochastic SIR model predicted  
 380 that extinction or elimination of the epidemic could have occurred within the United Kingdom within  
 381 4 to 5 months, which would be October/November 2020, if  $R_e$  can be kept to below about 0.5, and  
 382 assuming no immigration of cases. More precisely, if  $R_e = 0.4$ , the mean time is  $123 \pm 15$  days with  
 383 95% confidence intervals:(87, 145) days. On the other hand for  $R_e > 0.6$  we see extinction times  
 384 increase very rapidly and are of order years. However, it should be noted that should  $1/\gamma = 7$  days be  
 385 an underestimate of the infectious period then we would expect extinction times to be approximately  
 386 scaled upwards in proportion. On the other hand, taking the more recent situation (mid-August



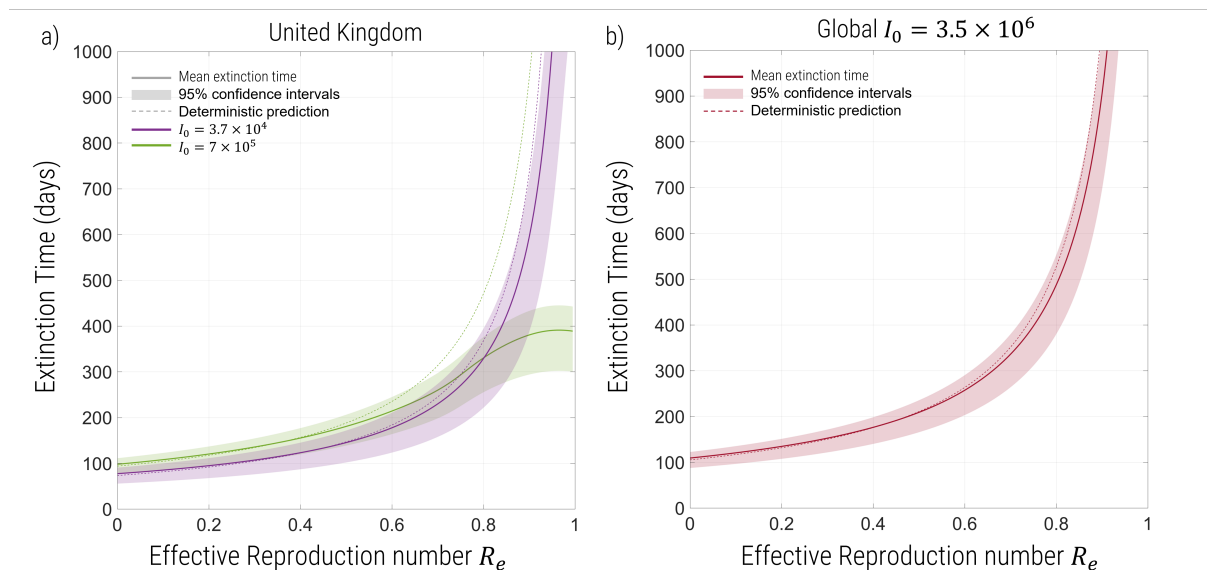

Figure 6: Prediction of the extinction times from analytical theory of the epidemic within the United Kingdom (a) and the pandemic globally (b) as a function of  $R_e$ . a) For the United Kingdom we use an initial infected population of  $I_0 = 3.7 \times 10^4$  with 10% of the population recovered and immune (purple) and  $I_0 = 7 \times 10^5$  with 70% of the population immune (green), both with  $1/\gamma = 7$  days. b) For the global prediction, we use an initial infected of  $I_0 = 3.5 \times 10^6$  and  $1/\gamma = 7$  days. Solid lines are the predictions of the mean (Eqn.8), whilst each shaded region corresponds to the 95% confidence interval (Eqn.11) and the deterministic prediction (Eqn.5) are the dashed lines.

387 2021) where  $I_0 \approx 7 \times 10^5$ , we see extinction can occur within about 6 months if  $R_e < 0.5$ , or  
 388 roughly by February 2022; more precisely the mean extinction time is predicted to be  $157 \pm 15$  days  
 389 (120, 177) if  $R_e = 0.4$ .

### 390 Global extinction time predictions

391 We can also use our calculation to make approximate predictions of global extinction times of SARS-  
 392 Cov-2, with all the same broad caveats, given the simplifications of the model. However, as  
 393 argued above at a global level, we can have confidence that the predictions of the extinction time  
 394 distribution Eqn.7 can be quantitatively correct, when the  $R_e$  value is effectively rescaled to account  
 395 for migration/air-traffic between nations. We choose to examine the time to extinction from the  
 396 period of summer 2020, as a hypothetical counterfactual scenario, where nations decided globally  
 397 to adopt an elimination strategy. In June 2020, the global death rate was very approximately 5,000  
 398 deaths per day, and so with an approximate infection fatality rate  $\eta \approx 0.01$ , (41, 42) the rate of  
 399 change of deaths would be roughly  $d(\text{deaths})/dt = \eta\gamma I(t)$ ; inverting this gives a crude estimate  
 400 of the current number of actively infected globally as  $I_0 \approx 3.5 \times 10^6$ , or roughly 3.5 million. More  
 401 precise estimates would require understanding the age structure of the infection fatality rate, which is  
 402 highly biased to older populations, as well as accounting for more recent improvements in treatments

403 of severe cases, but as extinction times are only logarithmically dependent on initial size (Eqn.8),  
404 these improvements would not significantly change these estimates. Given a global population of  
405 7.8 billion this corresponds to a global incidence of  $\approx 0.09\%$ . We further assume that as in the UK  
406 at the time very roughly 10% of the population had acquired immunity naturally. In Fig.6b we plot  
407 how the predicted extinction time changes with effective reproductive numbers between  $0 < R_e < 1$   
408 for  $1/\gamma = 7$  days. As would be expected, the results mirror the predictions for within the United  
409 Kingdom, except the plateau as  $R_e \rightarrow 1$  occurs at much longer times; for sufficiently small values  
410 of  $R_e$  ( $R_e < 0.5$ ), the theory predicts global extinction on a timescale of slightly greater than 200  
411 days or 7 to 8 months, whilst  $R_e > 0.6$  lead to very long extinction times ( $\sim$ years). More precisely,  
412 for  $R_e = 0.4$  and assuming  $1/\gamma = 7$  days, we find a mean extinction time of  $177 \pm 15$  days (95%  
413 CI: (140, 199) days). In this counterfactual scenario, global extinction of SARS-Cov-2 could have  
414 occurred by the beginning of January 2021.

## 415 Discussion & Conclusions

416 We have presented a new analysis of extinction in the stochastic SIR model in the context of  
417 populations with very little herd immunity and yet a significant number of infected individuals.  
418 Using simple random walk theory, we calculate the mean time to extinction and show that there is  
419 a critical threshold  $I^\dagger = 1/(1 - R_e)$ , below which random stochastic changes are more important,  
420 which suggests that for  $R_e < 1$ , but approaching 1, a simple deterministic prediction will be poor.  
421 With a more exact branching process analysis, we then calculate in closed form the extinction time  
422 distribution of an epidemic, which surprisingly, is an extreme value distribution of the Gumbel type,  
423 and is mainly dependent on the rate of decline of the epidemic  $\rho_e = \gamma(1 - R_e)$ , with a weak logarithmic  
424 dependence on  $R_e$  explicitly. A key advantage of a closed form solution for the distribution is that  
425 we can discern broad trends very quickly without doing a large number of complex simulations over  
426 a large parameter space. Given the simplicity of SIR well-mixed model, we compared our results to  
427 a complex spatial epidemic simulator, GleamViz (33, 34) with explicit heterogeneity in connections  
428 between sub-populations, as well as simulations of uniform migration between sub-populations and  
429 find good overall agreement for the distribution of extinction times with our simple predictions. We  
430 have also extended the theory of extinction to the whole range of  $0 < R_e < 1$ , where for  $R_e$  close to  
431 unity, herd or population immunity must play a role in the dynamics of the epidemic.

432 We use these results to produce predictions of extinction times within the UK and globally of  
433 the SARS-Cov-2 epidemic/pandemic under various scenarios, as a function of  $R_e$  as a guide to the  
434 expected trends in more complex models. The results suggest that if the reproductive number was  
435 constrained to  $R_e = 0.4$  (assuming  $1/\gamma = 7$  days), within the UK from mid-June 2020, extinction  
436 would have occurred with 97.5% probability by the end of October 2020 (145 days). Alternatively, if  
437 the UK were to enact the same measures now with the help of immunity afforded by vaccination, the  
438 theory predicts that extinction would occur with 97.5% probability by the middle of February 2022  
439 (177 days); note that in this scenario to achieve  $R_e = 0.4$  with NPIs is on one hand much easier  
440 with vaccination, but also more difficult due to the higher transmissibility of the  $\delta$ -variant. Globally,  
441 under a counterfactual scenario where all nations decided to adopt an elimination strategy in summer  
442 2020 with  $R_e = 0.4$ , the theory predicts extinction would have occurred with 97.5% probability by  
443 the beginning of January 2021 (199 days).

444 However, unless  $R_e$  is strongly controlled, extinction times increase to times of order years for  
445  $R_e > 0.6$ , as shown in Figs.6a&b and become increasingly unpredictable, which is an indication that  
446 the stochastic, random walk phase of the extinction process is dominant. On the other hand the  
447 same figures show that decreasing  $R_e$  much below  $R_e = 0.4$  produces diminishing gains in reductions  
448 of extinction times; hence, given social consequences of lockdown measures this suggests an optimal  
449  $R_e \approx 0.4 \rightarrow 0.5$ , which in the United Kingdom was achieved just after lockdown in regions such as  
450 London (43).

451 The basic calculation in this paper ignores spatial structure (3, 4) and heterogeneity of contacts  
452 between individuals (5). To assess the realism of our simple model, we performed simulations using a  
453 realistic spatial epidemic simulator, GleanViz, (33, 34) which gave a distribution of extinction times  
454 matching reasonably closely the Gumbel distribution in Eqn.7, with a slightly smaller mean time. On  
455 one hand we might expect spatial structure to give local deviations of the fraction of susceptibles  
456 from the global average, allowing herd immunity to arise locally in regions overall speeding up the  
457 decline of the epidemic, but on the other hand, migration between regions (as we see with the global  
458 migration simulations) act to slow down the decline. These results might suggest the well mixed  
459 model does reasonably well because of a cancellation of these two competing effects.

460 The simple SIR model also ignores age structure, as well as heterogeneity or individual variation in  
461 contact/spreading rates, which could give rise to super-spreading events. Although age structure has  
462 been shown to have a significant quantitative effect on the critical fraction of the population required  
463 to reach herd immunity (44, 45), here we expect for  $R_e < R_e^*$  (Eqn.12) as the calculation assumes  
464 negligible herd immunity, we do not expect that different age transmission matrices will affect our  
465 results for the same mean rate of transmission  $\beta$ . On the other hand the role of superspreaders and  
466 a very leptokurtic off-spring distribution could have a significant quantitative effect, although we  
467 expect the qualitative behaviour to remain unchanged; analysis of contact patterns for the spreading  
468 of SARS-Cov-2 estimate a dispersion parameter  $k$  in the range of 0.1 to 0.6 (46–48), which suggests a  
469 small number of individuals cause a majority of infections. As previous work has shown strong super-  
470 spreading tends to enhance the probability of extinction, when starting from a single individual (7).  
471 If few individuals carry the majority of infections, this might suggest that the number of infected is  
472 effectively smaller giving rise to a shorter time to extinction, than for smaller individual variation; this  
473 however, may be a relatively weak logarithmic effect, as suggested by the mean time to extinction  
474 expression calculated in this paper (Eqn.8).

475 We have also shown how to calculate accurate extinction time distributions for the case when  $R_e$   
476 is sufficiently close to 1 and when population immunity cannot be ignored, as shown in the predictions  
477 of Fig.6a, for the highly vaccinated UK population. When  $R_e$  is close to 1, changes in the susceptible  
478 pool due to new infections cause a large relative change in  $R_e$  itself and it cannot be considered  
479 constant; we find a simple expression for this threshold  $R_e^*$  and use a semi-heuristic method to calcu-  
480 late the extinction time distribution based on calculating the final or ultimate effective reproduction  
481 number  $R_e^\infty$ , which is arrived at once again infections drop to a level that new infections cause a  
482 small relative change in the susceptible pool. In general, we find that as  $R_e > R_e^*$  and approaches 1,  
483 the extinction times plateau, instead of diverging using the constant  $R_e$  theory. Interestingly, we find  
484 that in this regime higher initial infections lead to significantly shorter extinction times compared to  
485 lower initial infections, because the former leads to a lower  $R_e^\infty$ . This new theoretical calculation  
486 also shows explicitly that for the SIR model, the epidemic declines for  $R_e = 1$ , culminating in an  
487 asymptotic  $R_e = R_e^\infty < 1$  and ultimately extinction, whereas a naive expectation would be that the

488 epidemic does not grow or shrink when  $R_e = 1$ .

489 We have also made a very crude extrapolation of our results to extinction at the global level.  
490 The most problematic assumption, of course, is a single value of  $R_e$  globally, and so the predictions  
491 in Fig.6b should be viewed as a guide to what could be achieved globally if all countries acted  
492 roughly in the same way on average. As we show, sub-divided regions with uniform migration, simply  
493 lead to a upwards rescaling of  $R_e$  by factor  $(1 + \phi)$  where  $\phi$  is the migration probability, and so  
494 we can have confidence in these predictions, as long as  $R_e$  at a global level is suitably interpreted.  
495 Previous work on generalising the concept of the reproductive number to include spread between  
496 different regions, uses a different approach, by defining an analogous reproductive number  $R_*$  for  
497 regions, (3–5), i.e. how many sub-populations or regions have at least one infection, where migration  
498 plays an analogous role to individual contacts for the spread of infection in a single population. This  
499 gives rise to a condition for spread or decline of infections to multiple regions and eventually globally,  
500 if  $R_* > 1$  or  $R_* < 1$ , respectively. In the context of a local reproductive number  $R_e < 1$ , as has  
501 been discussed previously (3), it is still theoretically possible that  $R_* > 1$ , particularly when infection  
502 is highly prevalent in a region (due to a previous time when  $R_0 > 1$ , as has occurred across many  
503 countries with SARS-Cov-2 in 2020 before lockdowns were imposed); this can happen if the global  
504 contact probability is sufficiently large, meaning that the infection can continue to spread between  
505 countries and regions. However, these long distance seedings of infection will not in themselves  
506 lead to regional or national outbreaks, as long as locally  $R_e < 1$  (49); the simple upward rescaling  
507 of  $R_e \rightarrow (1 + \phi)R_e$ , which we observe for small  $\phi$  captures this phenomenon. These results also  
508 suggest that at the national level, a simple rescaling of  $R_e$  should describe the reduction in the rate of  
509 decline of infections due to importation of infected cases, and should be accounted in more accurate  
510 estimates of extinction times.

511 This brings up an important question: whether a country should pursue elimination whilst other  
512 countries are not and there is the chance cases can be imported. As alluded to above, whether before  
513 or after zero infections have been achieved, if the country pursuing elimination keeps  $R_e < 1$  through  
514 NPIs then there cannot be an outbreak; after zero infections have been achieved in practice there  
515 will clearly be a pressure to open up, but the counterfactual prediction above of global elimination  
516 by January 2021, essentially assumes this is not the case, that all countries keep  $R_e < 1$  until zero  
517 cases worldwide. If this is not the case, then with any level of migration and non-zero cases abroad,  
518 extinction is not a stable state. So in which case, what do the extinction times mean practically at  
519 the national level? If there is a total rate  $M$  of migrations of infected cases into a country per day  
520 and  $M \ll 1$  — for example, if there are strict control of immigration, and /or globally infections are  
521 rare — then extinction will be a meta-stable state with lifetime  $\approx 1/M$  days. On the other hand,  
522 if  $M \gtrsim 1$  due to open borders and/or highly prevalent infections abroad, then extinction cannot be  
523 achieved. As an illustration of these considerations, pre-pandemic levels of immigrations into UK  
524 were  $\approx 400,000$  per day (50), and assuming a prevalence of  $\approx 0.09\%$  globally (June 2020), that  
525 would mean  $M \approx 360$  infected arriving per day; however, according to the Civil Aviation Authority  
526 (UK) passenger numbers for June 2020 had dropped significantly, to roughly 2.4% of their levels  
527 in June 2019 (51), which would then suggest  $M \approx 6$  per day. If we further factor in quarantine  
528 rules for arrivals from specific countries, then it possible that in aggregate  $M < 1$ , or potentially  
529 even  $M \ll 1$ . In this case, extinction can persist for a period of time  $1/M$ , where a country would  
530 likely need to be prepared to act quickly to contain any potential outbreaks. This estimate itself is  
531 likely to be pessimistic, as each new infection must establish to the critical size  $I^* \sim R_e/(R_e - 1)$ ,

532 which has probability  $p^* = 1 - 1/R_e$  (Williams' threshold theorem (36)), before causing an outbreak  
533 and so if  $R_e$  is not too large many imported infections will initially stochastically die out, and as  
534 discussed if  $R_e < 1$  the probability is zero. Overall, these considerations highlights that technically  
535 extinction can only occur nationally when all infections globally have been eliminated; nonetheless, a  
536 joined-up global strategy would entail each country aiming for a state of quasi-extinction, by keeping  
537  $R_e \ll 1$ , where declining infections world-wide would lead to increasingly longer periods of zero  
538 infections nationally. Once infections have been eliminated locally/nationally, and while infections  
539 globally persist, this analysis would suggest only allowing  $R_e$  to be moderately greater than one,  
540 where the actual number would be a balance between acceptable border controls, relaxation of NPIs  
541 and how quickly NPIs can be re-introduced and affect a decline in infections, once new infections  
542 have been detected.

543 We see broadly the results in this paper demonstrate that in worst-case scenarios where vaccines  
544 cannot be developed for highly transmissible diseases, with relatively short recovery times ( $1/\gamma$ ),  
545 the alternative strategy of NPIs can be used to eliminate the virus on practicable time-scales of  
546 many months. In the case of SARS-Cov-2 , at the time of writing it is still not very clear to what  
547 degree vaccines can cut transmission (13–16), even though they have been demonstrated to be highly  
548 effective at preventing serious illness. If we assume that current vaccines do not cut transmission  
549 significantly, then as the results in Fig.6a show it is possible, assisted by population immunity, to  
550 eliminate Sars-Cov2 within the UK within about 6 months given the levels of infection at the time  
551 of writing ( $I \approx 7 \times 10^5$ ). However, it is also not known how long vaccine-induced immunity will last;  
552 if immunity wanes over the time-period of many months to years standard models, such as the SIRS  
553 model, show that our predictions are broadly correct — typically underestimating extinction times,  
554 since waning immunity leads to an increasing pool of susceptibles over time — except extinction is  
555 only possible if  $R_0 < 1$ , which could be achieved by NPIs. On the other hand opening up such that  
556  $R_0 > 1$ , with waning immunity, leads to an endemic state.

557 Related to vaccine efficacy, this paper also does not consider the trade-off between mitigation and  
558 elimination in terms of the evolution of new variants of concern, particularly vaccine escape variants.  
559 However, very broadly the literature on population rescue and evolution of resistance (52–54) clearly  
560 predicts that resistance is more likely with increasing effective population size. In an epidemiological  
561 setting, there is a multi-scale aspect to the problem, involving within-host vs between-host evolution,  
562 and potential trade-offs between the two (55–58), however, if we treat each infected individual as  
563 a unit of evolution which produces mutants at a certain rate (determined by selection through an  
564 evolutionary substitution process within host), then this would predict that vaccine escape becomes  
565 more likely with increasing number of infected individuals. As the cumulative number of infections  
566 will be lower with an elimination strategy compared to mitigation, we would expect elimination to  
567 have the added benefit of being robust to the evolution of new variants.

568 Finally an aspect, which we have not considered, is the possibility of a non-human reservoir  
569 of SARS-Cov-2 , which could allow re-infections of human populations, such that, as with the  
570 case of migrations, extinction is not a permanent (stable) state. This could be accounted in a  
571 similar way as we account for migration in this theory; unlike human populations (and arguably  
572 even in human populations), we have much less control, or even understanding, of a potential non-  
573 human reservoir. However, if such reservoirs, whether bat or pangolin (59, 60), can be identified  
574 and surveyed (61), measures can be taken to control contact with human populations, such that  
575 effective global elimination in human populations is possible, even if the virus cannot be eliminated

576 from non-human populations.

577 Overall our results suggest an viable and relatively rapid ( $\sim$  months) alternative strategy to  
578 eliminate infections without having to rely on herd immunity, either naturally acquired, or through  
579 vaccination; in a worst case scenario, for highly transmissible diseases where no effective vaccine is  
580 found, and/or immunity is short-lived, such alternative strategies may be the only option remaining.

## 581 References

- 582 1. W. O. Kermack, A. G. McKendrick, *Proceedings of the Royal Society*, **115A**, 700721 (1927).
- 583 2. J. Murray, *Mathematical Biology I: An Introduction* (Springer-Verlag, 2002), chap. 10, pp. 319–  
584 326.
- 585 3. F. Ball, D. Mollison, G. Scalia-Tomba, *The Annals of Applied Probability* **7**, 46 (1997).
- 586 4. P. C. Cross, J. O. Lloyd-Smith, P. L. F. Johnson, W. M. Getz, *Ecology Letters* **8**, 587 (2005).
- 587 5. V. Colizza, A. Vespignani, *Physical Review Letters* **99**, 148701 (2008).
- 588 6. N. M. Ferguson, *et al.*, *Nature* **425**, 681 (2003).
- 589 7. J. O. Lloyd-Smith, S. J. Schreiber, P. E. Kopp, W. M. Getz, *Nature* **438**, 355 (2005).
- 590 8. W. R. Dowdle, *Bulletin of the World Health Organization* **76 Suppl 2**, 22 (1998).
- 591 9. S. Hendy, *et al.*, *Journal of the Royal Society of New Zealand* **51**, 1 (2021).
- 592 10. H. Ward, *et al.*, *medRxiv* (2020).
- 593 11. A. W. D. Edridge, *et al.*, *Nature Medicine* **26**, 1691 (2020).
- 594 12. J. M. Dan, *et al.*, *Science* **371**, eabf4063 (2021).
- 595 13. M. C. Shamier, *et al.*, *medrxiv* (2021).
- 596 14. I. Kroidl, *et al.*, *Eurosurveillance* **26**, 2100673 (2021).
- 597 15. N. E. Blachere, E. Hacısuleyman, R. B. Darnell, *New England Journal of Medicine* **385**, e7  
598 (2021).
- 599 16. E. Hacısuleyman, *et al.*, *New England Journal of Medicine* **384**, 2212 (2021).
- 600 17. N. G. Davies, *et al.*, *Science* p. eabg3055 (2021).
- 601 18. K. Leung, M. H. Shum, G. M. Leung, T. T. Lam, J. T. Wu, *Eurosurveillance* **26** (2021).
- 602 19. S. A. Kemp, *et al.*, *Nature* pp. 1–10 (2021).
- 603 20. T. Crellen, *et al.*, *medRxiv* (2021).
- 604 21. T. Britton, *Mathematical biosciences* **225**, 24 (2010).



- 605 22. N. T. J. Bailey, *Biometrika* **50**, 235 (1963).
- 606 23. M. S. Bartlett, *Journal of the Royal Statistical Society. Series A (General)* **120**, 48 (1957).
- 607 24. M. S. Bartlett, *Applied Statistics* **13**, 2 (1964).
- 608 25. F. Ball, *Journal of Applied Probability* pp. 227–241 (1983).
- 609 26. A. D. Barbour, *Biometrika* **62**, 477 (1975).
- 610 27. P. Holme, *PloS one* **8**, e84429 (2013).
- 611 28. I. Nasell, *Journal of the Royal Statistical Society: Series B (Statistical Methodology)* **61**, 309  
612 (1999).
- 613 29. C. P. Farrington, A. D. Grant, *Journal of Applied Probability* **36**, 771 (1999).
- 614 30. Office for National Statistics, Coronavirus (COVID-19) Infection Survey pilot: England, 12 June  
615 2020.
- 616 31. Office for National Statistics, Coronavirus (COVID-19) Infection Survey, antibody data for the  
617 uk: 16 February 2021.
- 618 32. D. T. Gillespie, *Journal of computational physics* **22**, 403 (1976).
- 619 33. W. V. d. Broeck, *et al.*, *BMC infectious diseases* **11**, 37 (2011).
- 620 34. D. Balcan, *et al.*, *BMC medicine* **7**, 45 (2009).
- 621 35. M. M. Desai, D. S. Fisher, *Genetics* **176**, 1759 (2007).
- 622 36. T. Williams, *Advances in Applied Probability* **3**, 223 (1971).
- 623 37. R. A. Fisher, L. H. C. Tippett, *Mathematical Proceedings of the Cambridge Philosophical Society*  
624 **24**, 180 (1928).
- 625 38. E. J. Gumbel, *The Annals of Mathematical Statistics* **12**, 163 (1941).
- 626 39. Office for National Statistics, Coronavirus (COVID-19) Infection Survey pilot: England, 19 Febru-  
627 ary 2021.
- 628 40. A. W. Byrne, *et al.*, *medRxiv* p. 2020.04.25.20079889 (2020).
- 629 41. R. Verity, *et al.*, *The Lancet. Infectious diseases* **20**, 669 (2020).
- 630 42. S. Ghisolfi, *et al.*, Working Paper 535: Predicted COVID-19 Fatality Rates Based on Age, Sex,  
631 Comorbidities, and Health System Capacity (2020).
- 632 43. MRC Biostatistics Unit, University of Cambridge, COVID-19 Nowcast and forecast.  
633 <https://www.mrc-bsu.cam.ac.uk/now-casting/>.
- 634 44. T. Britton, F. Ball, P. Trapman, *Science (New York, N.Y.)* (2020).

- 635 45. M. Chikina, W. Pegden, *PLOS ONE* **15**, e0236237 (2020).
- 636 46. A. Endo, C. for the Mathematical Modelling of Infectious Diseases COVID-19 Working Group,  
637 S. Abbott, A. J. Kucharski, S. Funk, *Wellcome Open Res* **5** (2020).
- 638 47. D. C. Adam, *et al.*, *Nature Medicine* **26**, 1714 (2020).
- 639 48. L. Wang, *et al.*, *Nature Communications* **11**, 5006 (2020).
- 640 49. A. F. Siegenfeld, N. N. Taleb, Y. Bar-Yam, *Proceedings of the National Academy of Sciences*  
641 p. 202011542 (2020).
- 642 50. UK Government: Home Office, National Statistics: How many people come to the UK each year  
643 (including visitors)? [https://www.gov.uk/government/publications/immigration-statistics-year-](https://www.gov.uk/government/publications/immigration-statistics-year-ending-june-2019/how-many-people-come-to-the-uk-each-year-including-visitors)  
644 [ending-june-2019/how-many-people-come-to-the-uk-each-year-including-visitors](https://www.gov.uk/government/publications/immigration-statistics-year-ending-june-2019/how-many-people-come-to-the-uk-each-year-including-visitors).
- 645 51. Civil Aviation Authority, Airport data: [https://www.caa.co.uk/data-and-analysis/uk-aviation-](https://www.caa.co.uk/data-and-analysis/uk-aviation-market/airports/datasets/uk-airport-data/airport-data-2020-06/)  
646 [market/airports/datasets/uk-airport-data/airport-data-2020-06/](https://www.caa.co.uk/data-and-analysis/uk-aviation-market/airports/datasets/uk-airport-data/airport-data-2020-06/).
- 647 52. H. A. Orr, R. L. Unckless, *The American naturalist* **172**, 160 (2008).
- 648 53. H. A. Orr, R. L. Unckless, *PLoS genetics* **10**, e1004551 (2014).
- 649 54. J. Hermisson, P. S. Pennings, *Genetics* **169**, 2335 (2005).
- 650 55. S. Bonhoeffer, M. A. Nowak, *Proceedings of the National Academy of Sciences* **91**, 8062 (1994).
- 651 56. E. C. Holmes, *Journal of Virology* **77**, 11296 (2003).
- 652 57. C. Fraser, *et al.*, *Science* **343**, 1243727 (2014).
- 653 58. K. A. Lythgoe, L. Pellis, C. Fraser, *Evolution* **67** (2013).
- 654 59. K. G. Andersen, A. Rambaut, W. I. Lipkin, E. C. Holmes, R. F. Garry, *Nature Medicine* **26**, 450  
655 (2020).
- 656 60. A. Latinne, *et al.*, *bioRxiv* (2020).
- 657 61. M. Watsa, *Science* **369**, 145 (2020).

## 658 **Acknowledgements**

659 I thank John McCauley (The Francis Crick Institute), Austin Burt, Vassiliki Koufopanou, Tin-Yu Hui  
660 (Imperial College) and Ace North (Oxford) for their insights and useful comments on the manuscript.

## 661 **Competing interests**

662 The author declares that they have no competing interests.

## 663 **Data and materials availability**

664 Code to plot extinction time predictions and distributions, as well as for performing the Gillespie  
665 simulations can be found at <https://github.com/BhavKhatri/Stochastic-Extinction-Epidemic>.

## Supplementary Materials for

# How long does it take to eliminate an epidemic without herd immunity?

Bhavin S. Khatri\*

\*To whom correspondence should be addressed; E-mail: [bkhatri@imperial.ac.uk](mailto:bkhatri@imperial.ac.uk)

### **This PDF file includes:**

Supplementary Text

Figs. S1

References (S1)

## Supplementary Text

### Estimating extinction times from direct estimate of $\rho_e$

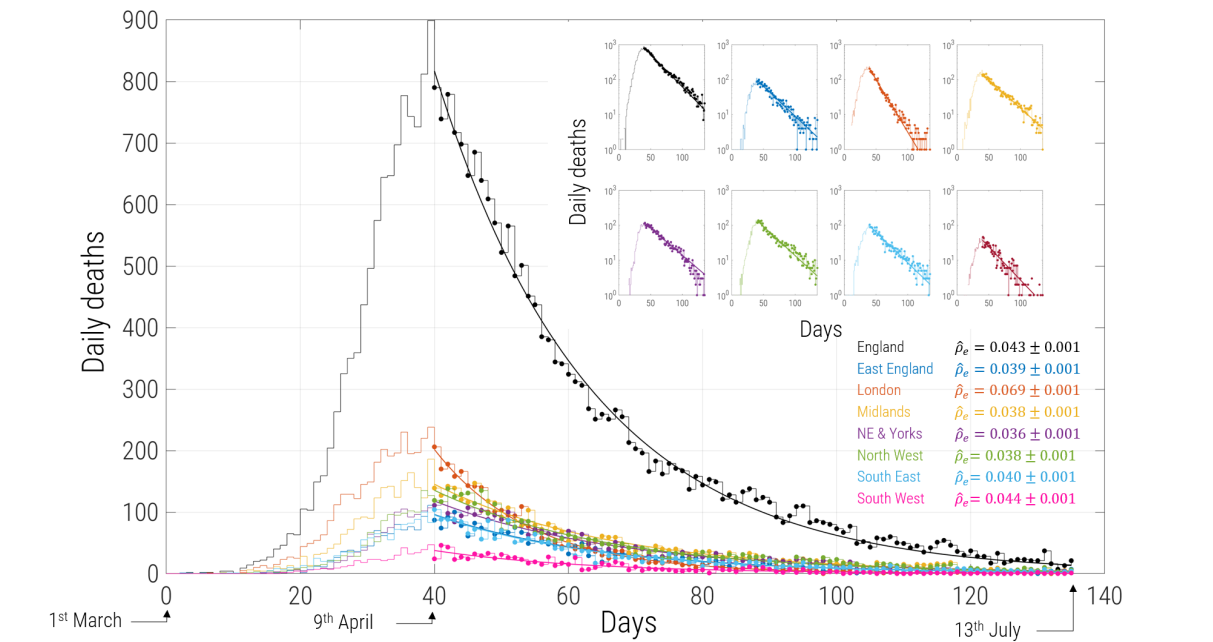

Figure S1: Data from NHS England (S1) on daily deaths within hospitals in England and different regions within England. Each region is fit using a simple decaying exponential from 40 days after the 1st March 2020, where each region first shows a clear decline in number of daily deaths.

Precise predictions of extinction times based on Eqn.7 in the main text require knowledge of both  $R_e$  and  $\gamma$ , which are generally quite difficult to estimate. However, Eqn.7 in the main text is mainly dependent on the rate of decline of the epidemic  $\rho_e$ , with weak dependence separately on  $R_e$  and  $\gamma$ .  $\rho_e$  can be determined more straightforwardly if we assume current daily deaths are proportional to the number infected; if infections are declining exponentially at a rate  $\rho_e$  then so will the number of daily deaths, so a curve fit will give an accurate measure of  $\rho_e$  even if we cannot determine the proportionality constant to translate deaths to infections. An alternative could be to look at time-series of number of daily infections per number of tests performed, to remove biases due to testing, however, here the aim is to illustrate why a direct estimate of  $\rho_e$  is useful, rather than to estimate this number very accurately.

As shown in Fig.S1, fitting decaying exponentials to daily number of deaths (date of death, not date of reporting) from the NHS UK (S1), from the moment of decline to 13th July 2020, shows

a very good fit (showing deaths are declining as a simple exponential and giving further weight to our simple model), giving an England wide estimate of  $\rho_e = 0.043 \pm 0.001 \text{ days}^{-1}$ , with a range of  $\rho_e = 0.036 \pm 0.001 \text{ days}^{-1}$  (slowest decline) for North Yorkshire and  $\rho_e = 0.069 \pm 0.001 \text{ days}^{-1}$  (most rapid decline) in London. As an example, we estimate the mean time to extinction had the UK remained in lockdown from July 2013, when infections were  $I_0 \approx 3.7 \times 10^4$ ; using the rate of decline of England, we estimate a mean extinction time in the UK as  $231 \pm 30$  days (95% CI: (187, 303) days), for  $R_e = 0.7$ ,  $1/\gamma = 7$  days and  $238 \pm 30$  days (95% CI: (195, 310) days), for  $R_e = 0.57$ ,  $1/\gamma = 10$  days; as we can see changing  $R_e$  and  $\gamma$  for a fixed  $\rho_e$  does not change the predictions significantly, and we suggest in general, determining  $\rho_e$  could be a more robust way to estimate extinction times.

## Branching process analysis

A birth-death process with birth rate  $b = \gamma R_e$  and death rate  $d = \gamma$ , corresponds to a pure exponential growth ( $R_e > 1$ ) or decay ( $R_e < 1$ ) phase of an epidemic, when the number of susceptible individuals  $S(t)$  are far in excess of the total number infected  $I(t)$ . In this appendix, for presentational clarity, we will use  $n = I$  to represent the number of infected individuals. To write down the rate of change of the probability of  $n$  infected individuals at time  $t$ , we need only consider the probability of having  $n - 1, n, n + 1$  individuals and rates of transitions between them, since in the limit of infinitesimal (continuous) changes in time, we consider only changes of single individuals. The rate of transition from  $n - 1 \rightarrow n$  happens with rate  $\gamma R_e(n - 1)$  and the rate of transition from  $n + 1 \rightarrow n$  happens with rate  $\gamma(n + 1)$ , which both lead to an increase in the probability of  $n$ , while the rate of transition from  $n \rightarrow n + 1$  happens with rate  $\gamma R_e n$  and the rate of transition from  $n \rightarrow n - 1$  happens with rate  $\gamma n$ , which both decrease the probability of  $n$ . Using these facts we can write down the rate of change of the probability of  $n$  at time  $t$ :

$$\frac{dp_n(t)}{dt} = \gamma(R_e(n - 1)p(n - 1, t) - (R_e + 1)np(n, t) + (n + 1)p(n + 1, t)). \quad (\text{S1})$$

However, this description isn't complete, and we need to consider how the probability of the  $n = 0$  state changes, since the above equation won't work for  $n = 0$ , since we cannot have a negative number of individuals:

$$\frac{dp_{n=0}(t)}{dt} = -\gamma(R_e np(n, t) + (n + 1)p(n + 1, t)). \quad (\text{S2})$$

We can encompass both equations together in one by using the unit step function  $U_n = 1$  for  $n \geq 0$ , while  $U_n = 0$  for  $n < 0$ :

$$\frac{dp(n, t)}{dt} = \gamma(U_{n-1}R_e(n - 1)p(n - 1, t) - U_n(R_e + 1)np(n, t) + (n + 1)p(n + 1, t)). \quad (\text{S3})$$



For  $n < 0$ , as long as we have an initial condition,  $p_{n<0}(t = 0) = 0$ , the ODEs above guarantee that  $p_{n<0}(t) \forall t$ . Considering each value of  $n : 0 \leq n < \infty$ , we have an infinite set of coupled differential equations. The standard way to solve this is to use probability generating functions:

$$G(z, t) = \sum_{n=0}^{\infty} p_n(t) z^n, \quad (\text{S4})$$

which is in general a complex function of a complex variable  $z$ . Using the fact that  $z \partial G(z, t) / \partial t = \sum n p_n(t) z^n$ , it is straightforward to show that the set of ODEs give the following first order partial differential equation for  $G(z, t)$ :

$$\frac{\partial G(z, t)}{\partial t} = \alpha(z) \frac{\partial G(z, t)}{\partial z}, \quad (\text{S5})$$

where

$$\alpha(z) = \gamma(R_e z^2 - (R_e + 1)z + 1). \quad (\text{S6})$$

This PDE can be solved by using the method of characteristics, which finds a parametric path  $z(s), t(s)$  along which our original PDE is obeyed. The rate of change of  $G(s)$  along this path in terms of our parameterisation is:

$$\frac{dG(s)}{ds} = \frac{dt}{ds} \frac{\partial G}{\partial t} + \frac{dz}{ds} \frac{\partial G}{\partial z}, \quad (\text{S7})$$

and so with reference to the original PDE (Eqn.S5), we can identify that

$$\frac{dt}{ds} = 1 \quad \frac{dz}{ds} = -\alpha(z). \quad (\text{S8})$$

Integrating these pair of equations gives the characteristic paths for which  $dG(s)/ds = 0$  is a constant:

$$\frac{z - 1}{z - 1/R_e} e^{\gamma(R_e - 1)t} = C, \quad (\text{S9})$$

where  $C$  is a constant that represents different possible initial conditions. Integrating  $dG(s)/ds = 0$ , gives

$$G(s) = \phi \left( \frac{z - 1}{z - R_e^{-1}} e^{\gamma(R_e - 1)t} \right), \quad (\text{S10})$$

where  $\phi$  is an arbitrary function to be determined by consideration of the initial conditions on  $p_n(t)$ . We can use the fact that at time  $t = 0$  we assume we know the exact number of infected individuals is  $n_0$  and hence,  $p_n(t = 0) = \delta_{nn_0}$ , where  $\delta_{nn_0} = 0$  for  $n \neq n_0$  and  $\delta_{nn_0} = 1$  for  $n = n_0$ . Calculating the probability generating function for the initial delta function probability mass, we get  $G(z, t = 0) = z^{n_0}$ , and so we need to find a function  $\phi$  satisfying:

$$G(z, 0) = \phi \left( \frac{z - 1}{z - R_e^{-1}} \right) = z^{n_0}. \quad (\text{S11})$$

Substituting  $x = (z - 1)/(z - 1/R_e)$ , we can find  $\phi(x)$ , to give our solution:

$$G(z, t) = \left( \frac{1 + (z - 1)e^{\gamma(R_e - 1)} - zR_e}{1 + R_e(z - 1)e^{\gamma(R_e - 1)} - zR_e} \right)^{n_0}. \quad (\text{S12})$$

Our probability mass function  $p_n(t)$ , should always be normalised  $\sum_n p_n(t) = G(z = 1, t) = 1$ ; substituting  $z = 1$  we see this that the solution  $G(z, t)$  behaves correctly. Finally, the reason this is all useful, is that we want to calculate the probability of zero individuals infected  $p_0(t)$ , which is simply given by  $G(z = 0, t)$ , since  $0^0 = 1$ :

$$p_0(t) = G(0, t) = \left( \frac{1 - e^{\gamma(R_e - 1)}}{1 - R_e e^{\gamma(R_e - 1)}} \right)^{n_0}. \quad (\text{S13})$$

Substituting  $n_0 = I_0$  and  $\rho_e = \gamma(1 - R_e)$  gives Eqn.6 in the main text.

Differentiating Eqn.S13 to obtain the extinction time distribution, we find

$$p^\dagger(t) = \frac{dp_0(t)}{dt} = (1 - R_e)\rho_e n_0 \frac{(1 - e^{-\rho_e t})^{n_0 - 1}}{(1 - R_e e^{-\rho_e t})^{n_0 + 1}} e^{-\rho_e t}. \quad (\text{S14})$$

This is an exact expression, which is valid for all values of  $I_0$  and  $I^\dagger$ , as long as the original assumptions of the model that changes in susceptible numbers are negligible ( $R_e < R_e^*$ ) is true, where  $R_e^*$  is given by Eqn.S19. If  $I_0 \gg I^\dagger$  then we expect there to be a strong division between the deterministic phase and the stochastic phase, such that in Eqn.S14 the exponentials have sufficiently decayed such that  $n_0 e^{-\rho_e t} \ll 1$ , before any extinction is likely, then it is straightforward to show that the limiting form of Eqn.S14, is the Gumbel distribution, Eqn.7 in the main text, using the fact that  $(1 - e^{-\rho_e t})^{n_0} \approx (1 - n_0 e^{-\rho_e t}) \approx \exp(-n_0 e^{-\rho_e t})$ .

## Extinction for $R_e > R_e^*$

Infections decline when  $R_e < 1$ .  $R_e(t) = R_0 \times S(t)/N$  is in general time-dependent, composed of two factors,  $R_0 = \beta/\gamma$ , which for simplicity we assume is time-independent and  $S(t)/N$ , which will tend to decrease in time as more susceptibles become infected, so the rate of decline  $\rho_e = \gamma(1 - R_e)$  is in general time-dependent and increasing over time. When  $R_e \ll 1$ , reductions in transmissions due to NPIs dominates the decrease in infections, compared to the fractional change in the susceptible pool and so  $R_e \approx R_0 S_0/N$  is constant to a good approximation. However, when  $R_e < 1$  but close to 1, this is no longer true, and the assumption that the number of susceptibles is roughly constant  $S(t) \approx S_0$  with respect to changes in  $I(t)$  and  $R_e(t)$  is a poor one.

It is within this context that we would like to calculate the extinction time distribution. Although, an exact solution is not easily obtainable, we can make a semi-heuristic approximation that works very well. Initially  $R_e$  is time-dependent since the changing susceptible pool has significant affect on the decline in infections. However, once infections become sufficiently small the change in the susceptible pool, per unit time, once again becomes relatively small compared to its current value and  $S(t) \rightarrow S^\infty$  attains its asymptotic value  $S^\infty$ , at which point the constant  $R_e$  assumption becomes accurate again and infections decline at a constant rate. The asymptotic value  $S^\infty$  cannot be calculated via standard fixed point analysis of the SIR differential equations, since the only condition

for a fixed point is that  $I = 0$ , and this can happen for any value of  $S$ ; the final asymptotic values depend on the initial conditions. Taking the SIR differential equations and calculating  $\dot{S}/\dot{R}$  we have

$$\frac{dS}{dR} = -\frac{\beta S}{\gamma N} = \frac{R_0}{N} S. \quad (\text{S15})$$

Integrating this equation, starting from an initial condition  $S(0) = S_0$  and  $R(0)$  to their final asymptotic values  $S^\infty$  and  $R^\infty = N - I^\infty - S^\infty = N - S^\infty$ , then we arrive at the following transcendental equation for  $S^\infty$ :

$$S^\infty = S_0 e^{R_0(1-S^\infty/N-R(0)/N)}. \quad (\text{S16})$$

The solution can however, be expressed using the Lambert  $W$  function:

$$S^\infty = -\frac{N}{R_0} W\left(-\frac{R_0 S_0}{N} e^{-R_0(1-R(0)/N)}\right), \quad (\text{S17})$$

where  $w = W(z)$  is the solution to the transcendental equation  $w e^w = z$ . We are interested in finding the asymptotic effective reproductive number  $R_e^\infty = R_0 S^\infty / N$  in terms of the initial effective reproductive number  $R_e = R_0 S_0 / N$ , for which the above expression can be rearranged to give

$$R_e^\infty = -W\left(-R_e e^{-R_0(1-R(0)/N)}\right). \quad (\text{S18})$$

We can replace  $R_e \rightarrow R_e^\infty$  in Eqn.7 of the main text to calculate the distribution of extinction times to give a good approximation of the extinction times when  $R_e \approx 1$  and where the above condition for constant  $R_e$  is not met. However, this gives a systematic underestimate of the time to extinction, since it effectively ignores the time it takes to attain these asymptotic values, which takes of order  $1/\rho_e^\infty$  days, where  $\rho_e^\infty = \gamma(1 - R_e^\infty)$ . So finally an accurate and robust approximation to the extinction time distribution is obtained by the replacement  $R_e \rightarrow R_e^\infty$  and  $\tau^\dagger \rightarrow \tau^\dagger + 1/\rho_e^\infty$ , as we can see in Fig.4b in the main text for simulations of  $R_e = 0.99$  and  $1/\gamma = 7$  days. Note that for sufficiently small  $R_e$  the correction to  $\tau$  is not needed, as  $R_e^\infty \approx R_e$  and the assumption of constant  $R_e$  is very accurate. We approximate this threshold value of  $R_e$  as the value of  $R_e^\infty (R_e \rightarrow 1)$ :

$$R_e^* = R_e^\infty (R_e = 1) = -W(-e^{-R_0(1-R(0)/N)}). \quad (\text{S19})$$

which is roughly the plateau value of  $R^\infty$ , which will robustly be close to the value of  $R_e$  that  $R_e^\infty$  begins to deviate from  $R_e$ . We can then also stitch together  $\tau^\dagger$  for  $R_e < R_e^*$  and  $\tau + 1/\rho_e^\infty$  for  $R_e > R_e^*$  using a standard tanh switching function centred on  $R_e^*$  and with width 0.05, which is used in Figs. 5&6 in the main text to provide the extinction time predictions across the whole range of  $0 < R_e < 1$ .

## Invariance of extinction time distribution to population sub-division

If we imagine a single population to be divided into  $n$  equally sized sub-populations, each with a reproductive number  $R_e$  and zero-migration between, then the extinction time distribution of  $t_k$  in the  $k^{\text{th}}$  sub-population will be given by Eqn.7 in the main text, but with  $I_0 \rightarrow I_0/n$ . Now we want

to calculate the extinction time distribution of the whole population. Extinction will occur when all sub-populations have zero infected individuals. We can record the extinction times in each sub-population:  $t_1, t_2, \dots, t_k, \dots, t_n$  and the extinction time of the whole population will be the maximum of this set:  $\tilde{t} = \max\{t_1, t_2, \dots, t_k, \dots, t_n\}$ . The cumulative distribution function of the maximum time  $\tilde{t}$  will be the probability of the joint event that each sub-population  $k$  has an extinction time less than  $\tilde{t}$ :

$$\begin{aligned} P_n(\tilde{t}) &= P(t_1 < \tilde{t}, t_2 < \tilde{t}, \dots, t_k < \tilde{t}, \dots, t_n < \tilde{t}) \\ &= P(t_1 < \tilde{t})P(t_2 < \tilde{t})\dots P(t_k < \tilde{t})\dots P(t_n < \tilde{t}) \\ &= (P(\tilde{t}))^n \end{aligned} \tag{S20}$$

where  $P(t)$  is the CDF for a single population given by Eqn.10 in the main text, but with  $I_0 \rightarrow I_0/n$ . Given the form of Eqn.10, these calculations can be performed exactly, whereas using extreme value theory it usually required that the tails of the distribution asymptotically obey some exponential form, which allows approximate calculation. Doing these calculations we find  $(P(\tilde{t}))^n = (\exp(-e^{-\rho_e(\tilde{t}-\tau_n^\dagger)}))^{n^2}$ , where  $\tau_n^\dagger = \frac{1}{\rho_e} \ln(I_0/nI^\dagger)$ . It is then simple to show that the  $n$ -dependence cancels in the final result to give

$$P_n(\tilde{t}) = P(\tilde{t}) = \exp(-e^{-\rho_e(\tilde{t}-\tau^\dagger)}). \tag{S21}$$

In other words, population sub-division into equal sized isolated populations does not affect the extinction time distribution of the whole global population. In fact, it is simple to extend these arguments to any population sub-division, where  $I_0 = \sum_{k=1}^n I_k$ , where  $I_k$  is the initial infected population in each, as long as the fraction of susceptible and  $R_e$  is the same in each sub-population. This is not surprising, as it is just a restatement of the mean-field/well-mixed approximation that infected individuals and sub-populations all experience the same probability of encountering a susceptible individual  $S_0/N$  which is set by the global number of susceptible individuals  $S_0$ .

## References

- S1. NHS England, NHS UK COVID-19 all announced deaths – 18th July 2020. <https://www.england.nhs.uk/statistics/statistical-work-areas/covid-19-daily-deaths/>.
